# Supplementary material
Source: Springer Nature journal article supplement (https://www.springermedizin.de/resource/supplementary/13256_2011_2067_MOESM3_ESM.pdf/9649792)

## Serial serum $\beta$ . hCG in million mIU/ml

—  $\beta$ . hCG in million mIU/ml

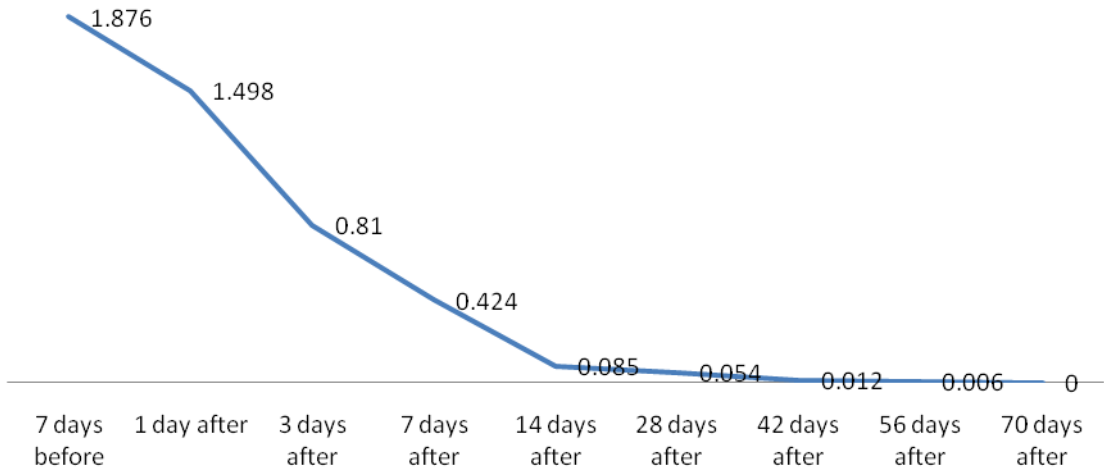

Supplement: MOESM3 [file 9649792]
